# Supplementary material for: TOF-SIMS analysis of curcuminoids and curcumin crystals crystallized from their pure and impure solutions
Source: Royal Society of Chemistry journal article supplement (doi:10.1039/d1ce01645h), 2022-01-01
Supplement: d1ce01645h1.pdf [file d1ce01645h1.pdf]

Supplementary information for 'TOF-SIMS analysis of curcuminoids and curcumin crystals crystallized from their pure and impure solutions'

K. Vasanth Kumar,<sup>(a,b)‡\*</sup> Claire Heffernan,<sup>(a)#</sup> Kiran A. Ramisetty,<sup>(a)†</sup> Christopher A Howard<sup>(c)</sup> and Sergey Beloshapkin<sup>(a)‡</sup>

(a) Synthesis and Solid State Pharmaceutical Centre and Bernal Institute, University of Limerick, Ireland.

(b) Pharmaceutical Manufacturing Technology Centre (PMTc), University of Limerick, Ireland.

(c) Department of Physics & Astronomy, University College London, London, WC1E 6BT, United Kingdom.

‡Equal contribution

Present address

# AstraZeneca, Charter Way, Macclesfield SK10 2NA, United Kingdom.

†MSD Ballydine, Kilsheelan, Clonmel, Co Tipperary Tipperary, Ireland.

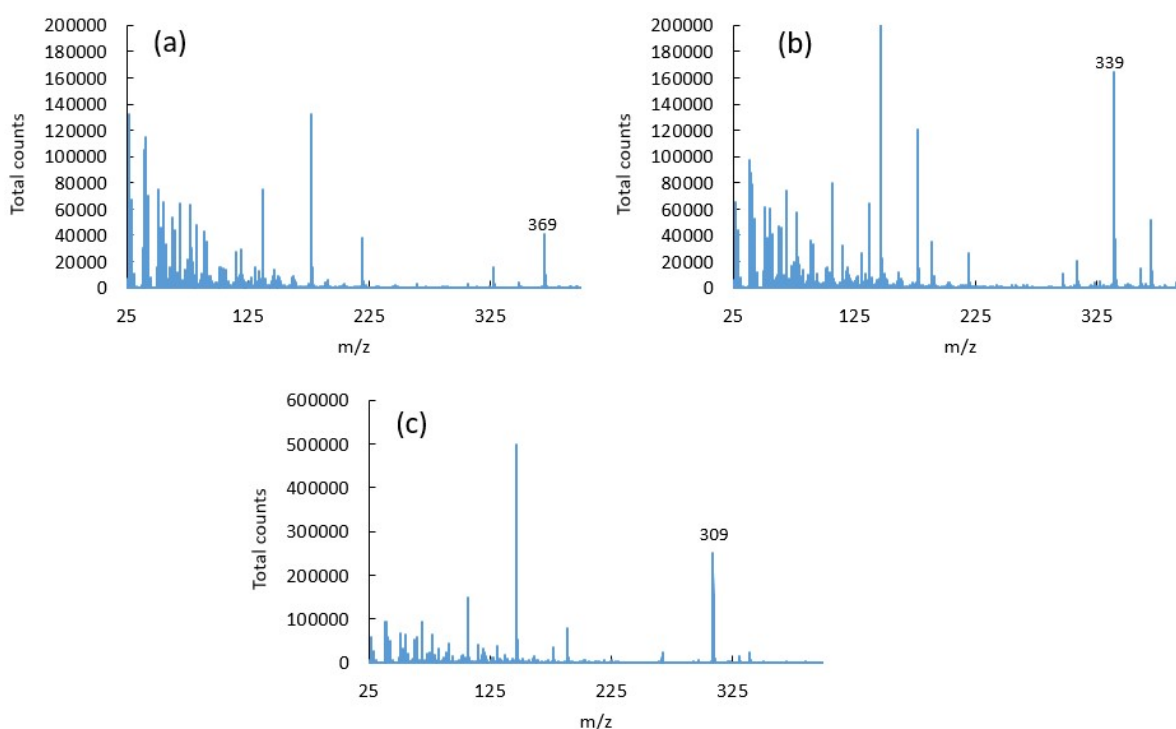

Figure 1s: The positive ions ToF-SIMS (measured by  $\text{Bi}_3^+$ ) of each of the pure components (curcuminoids standards) of (a) CUR, (b) DMC and (c) BDMC.

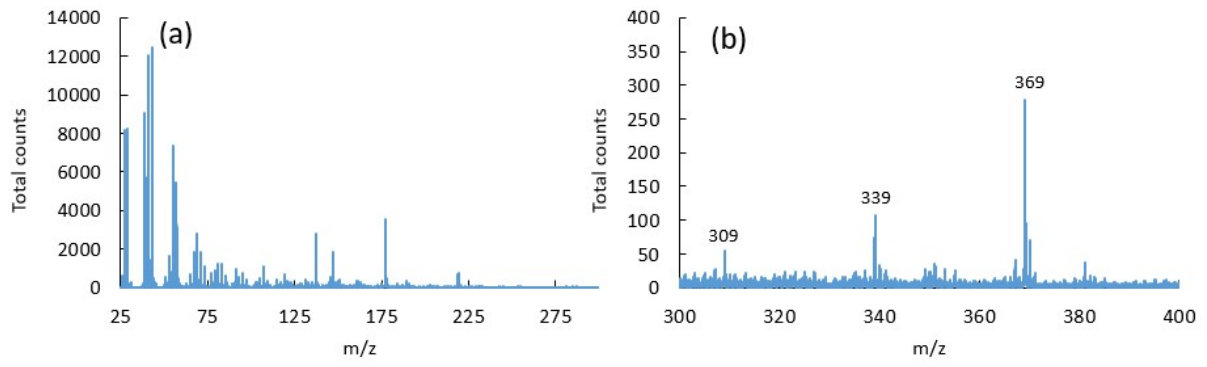

Figure 2s (a & b): The positive ions ToF-SIMS (measured by  $\text{Bi}_3^+$ ) of each of the crude curcumin
